# Supplementary material for: Addition of bevacizumab enhances antitumor activity of erlotinib against non-small cell lung cancer xenografts depending on VEGF expression
Source: PubMed Central journal article supplement (PMC4236614; doi:10.1007/s00280-014-2610-x), 2014-10-26

# Supplementary Fig. 1

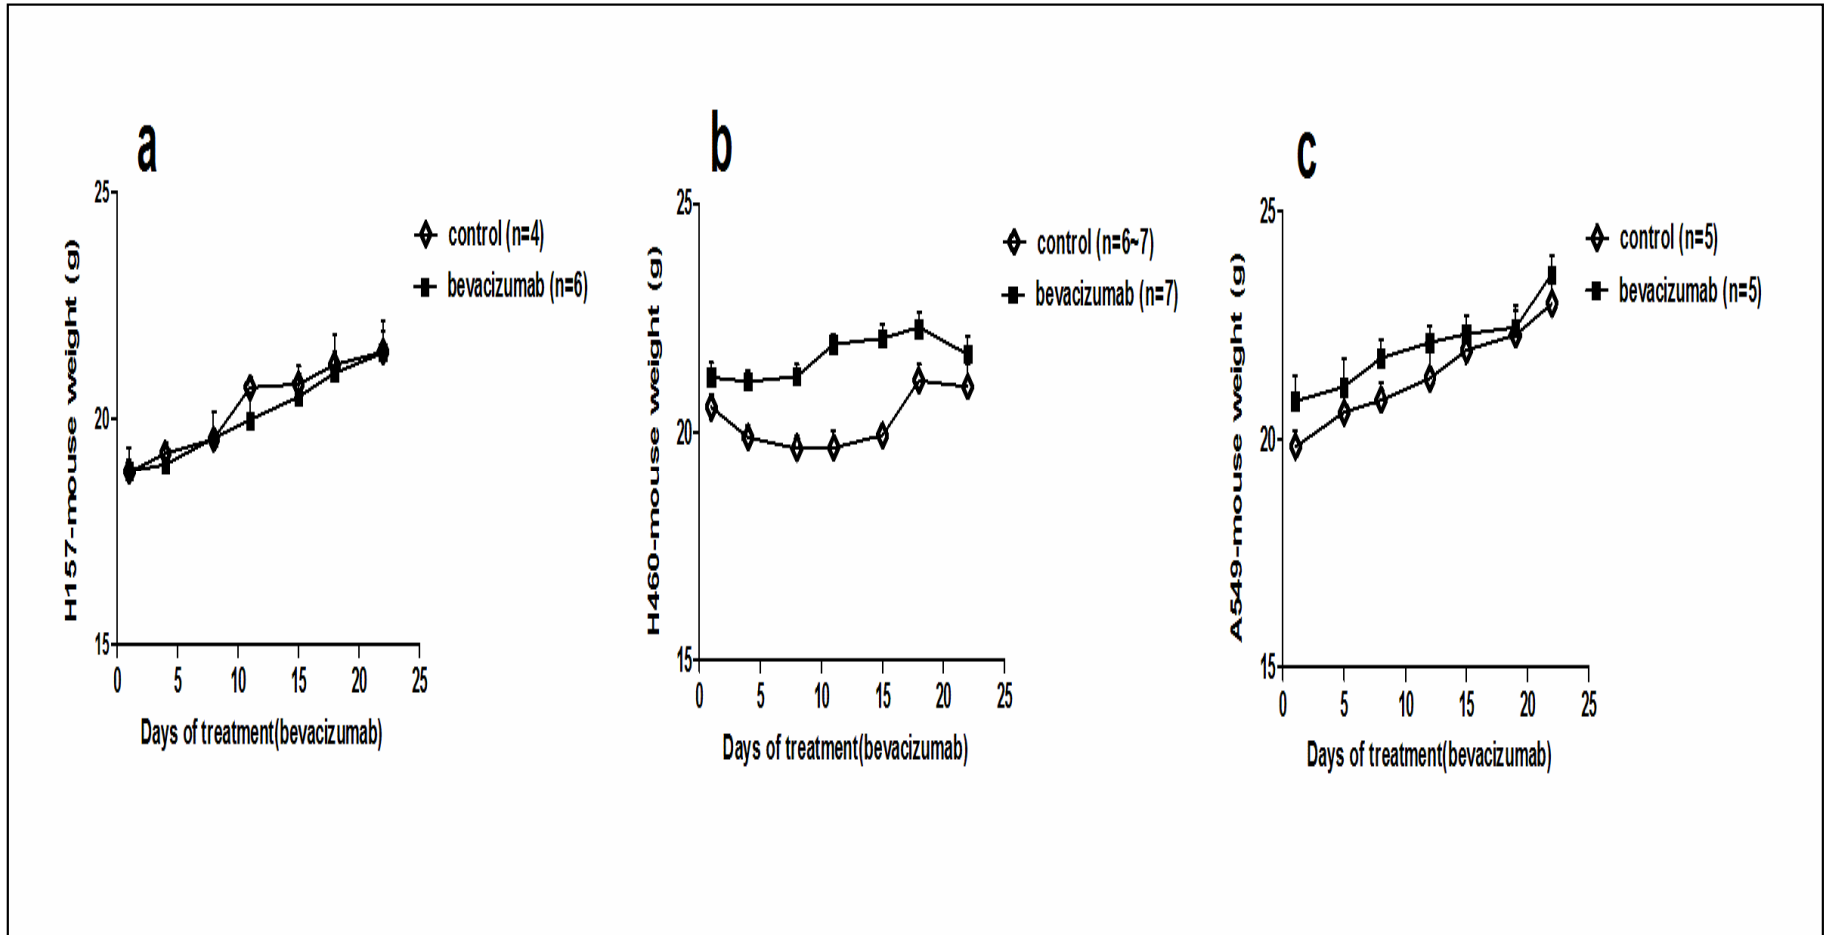

## Supplementary Fig. 2

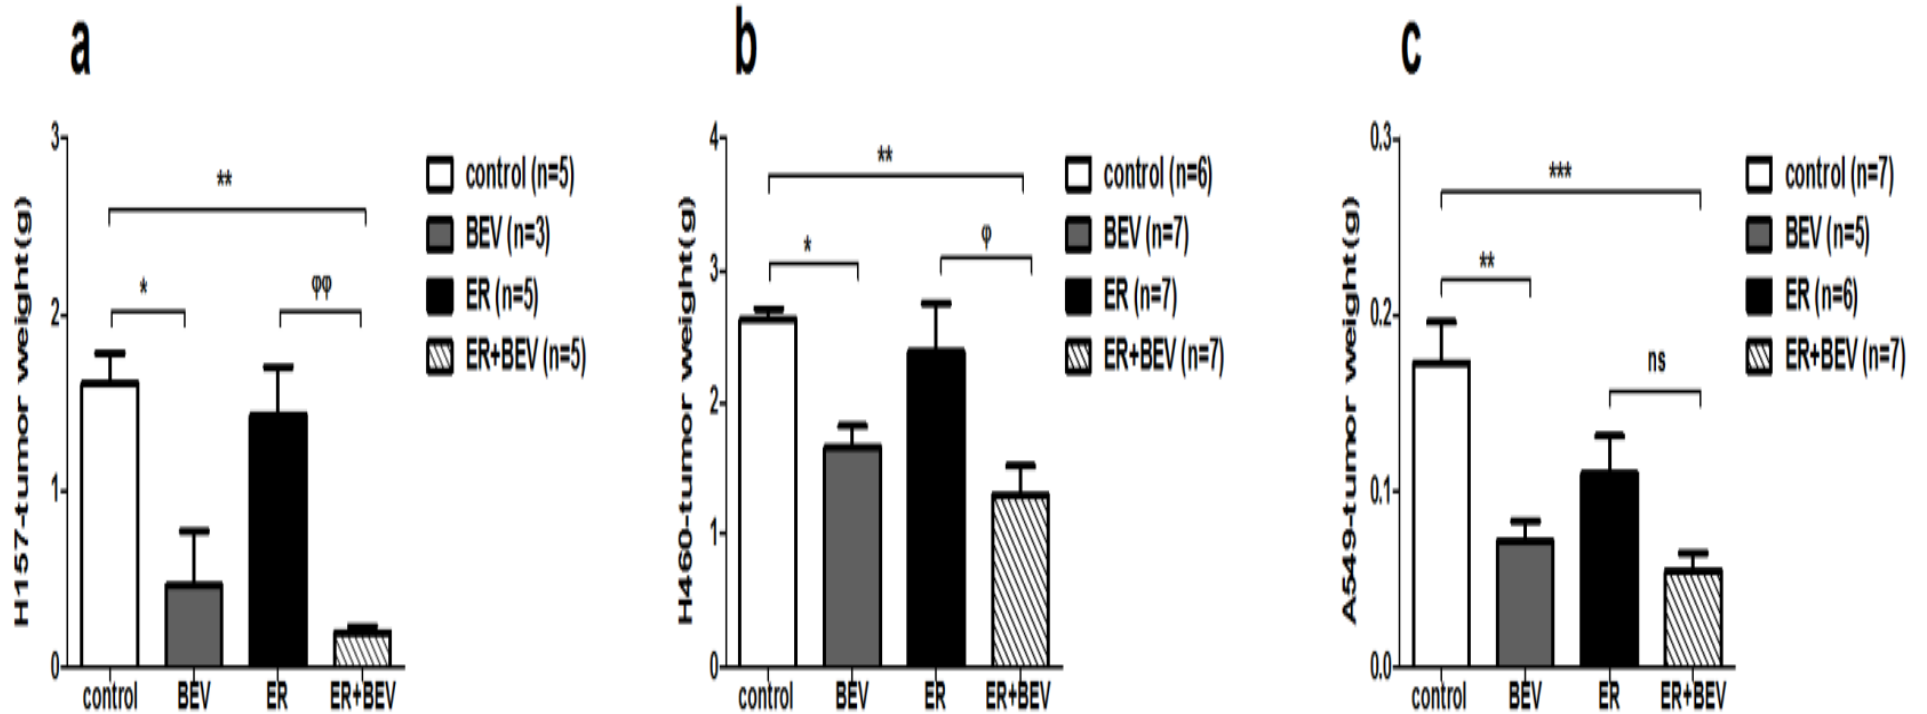

# Supplementary Fig. 3

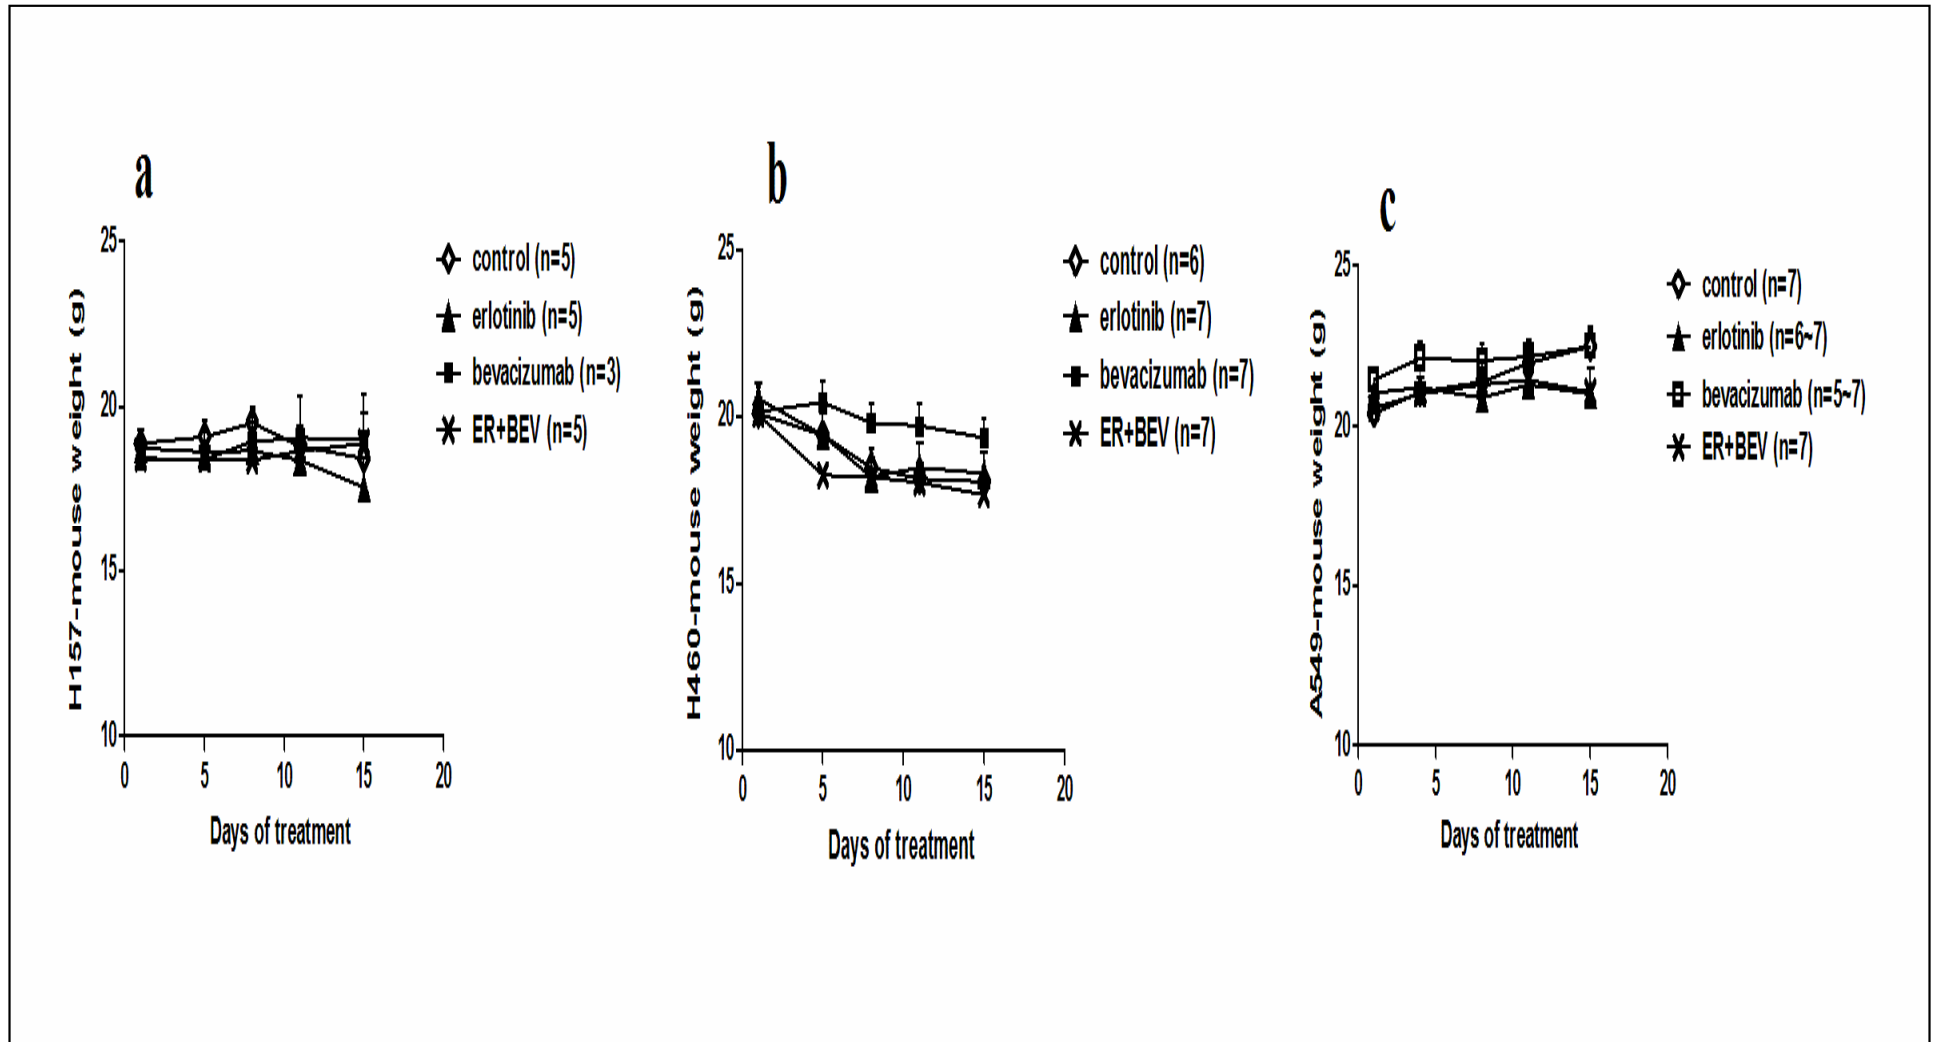

Supplement: 280_2014_2610_MOESM1_ESM.pdf [file 280_2014_2610_MOESM1_ESM.pdf]
